# Supplementary material for: Bioclimatic and Landscape Factors drive the Potential Distribution of Philaenus spumarius, Neophilaenus campestris and N. lineatus (Hemiptera, Aphrophoridae) in Southeastern Iberian Peninsula
Source: MDPI journal article supplement (doi:10.3390/insects14070592), 2023-06-30

# *Philaenus spumarius*

2020/05/22

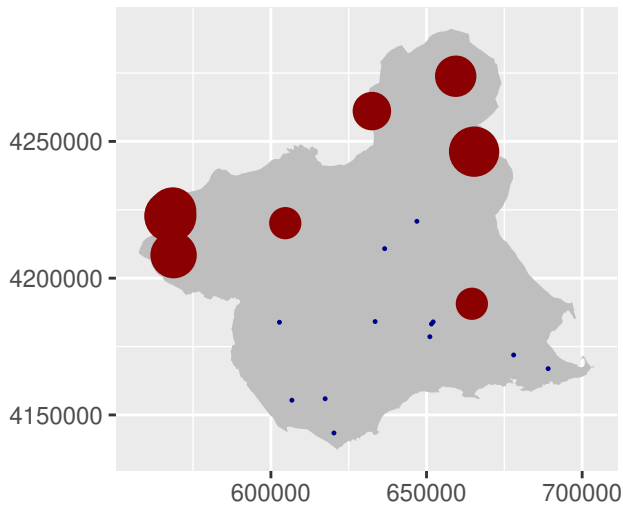

# *Philaenus spumarius*

2020/06/18

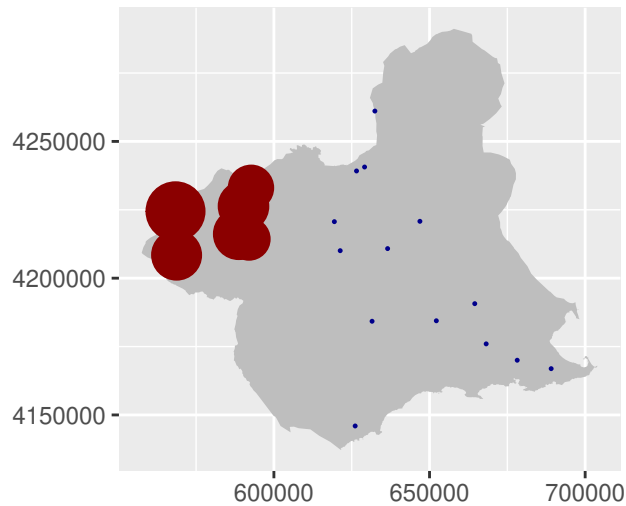

# *Philaenus spumarius*

2020/06/05

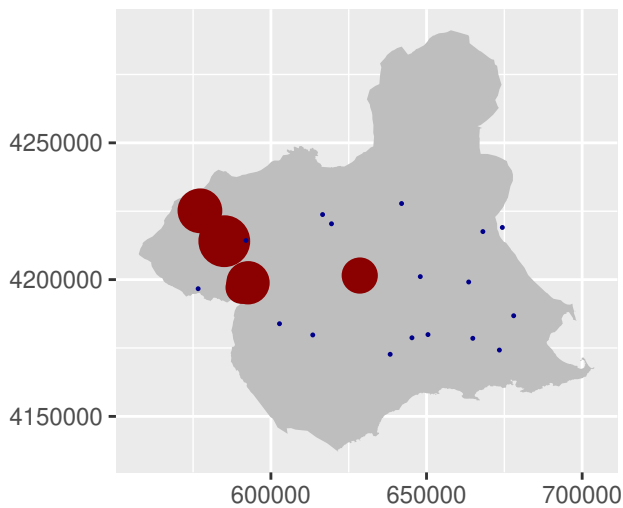

# *Philaenus spumarius*

2020/07/03

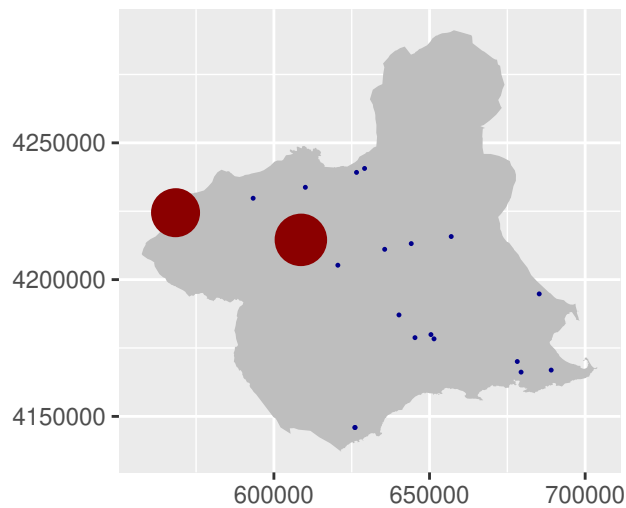

# *Philaenus spumarius*

2020/07/17

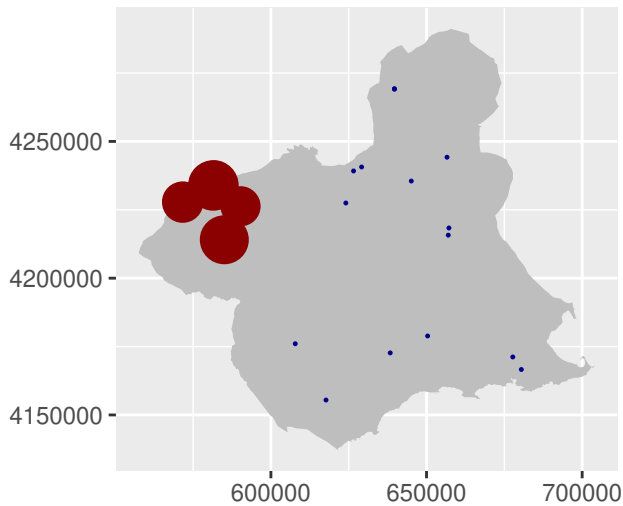

# *Philaenus spumarius*

2020/08/13

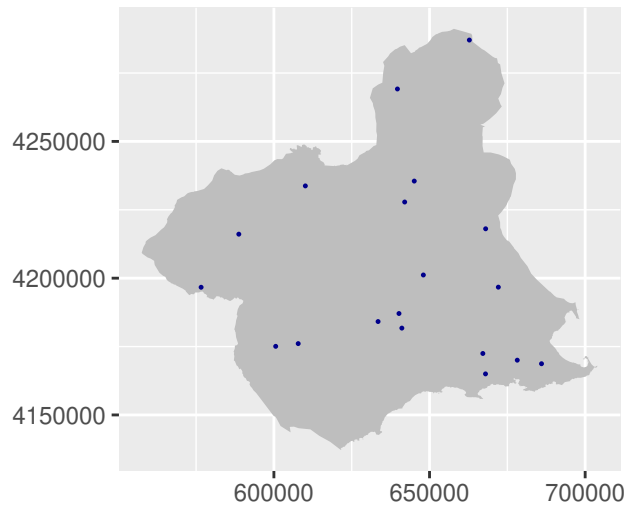

# *Philaenus spumarius*

2020/07/31

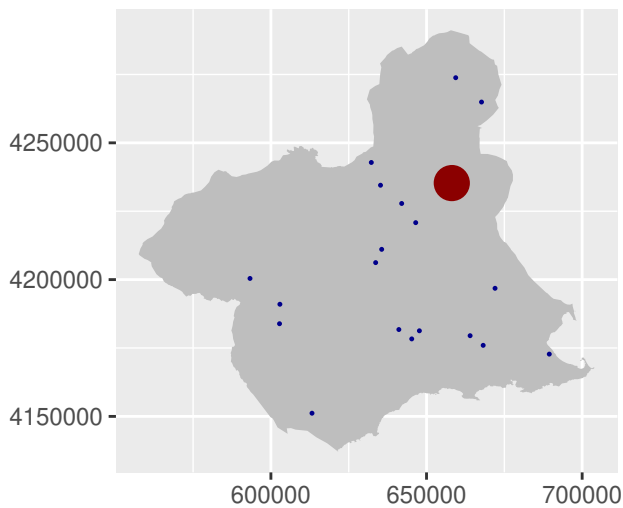

# *Philaenus spumarius*

2020/08/31

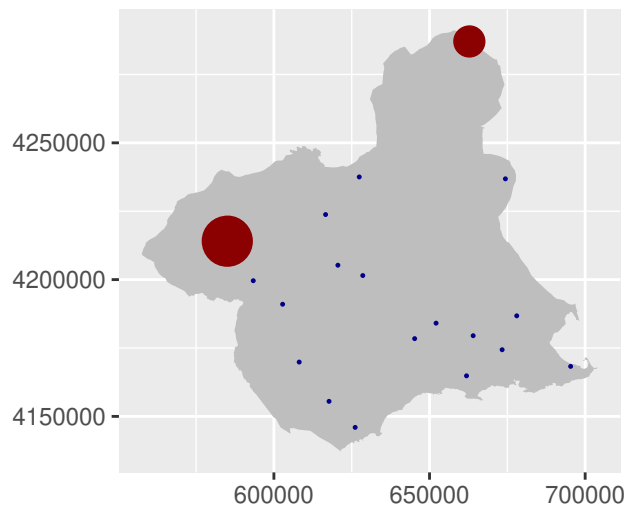

# *Philaenus spumarius*

2020/09/15

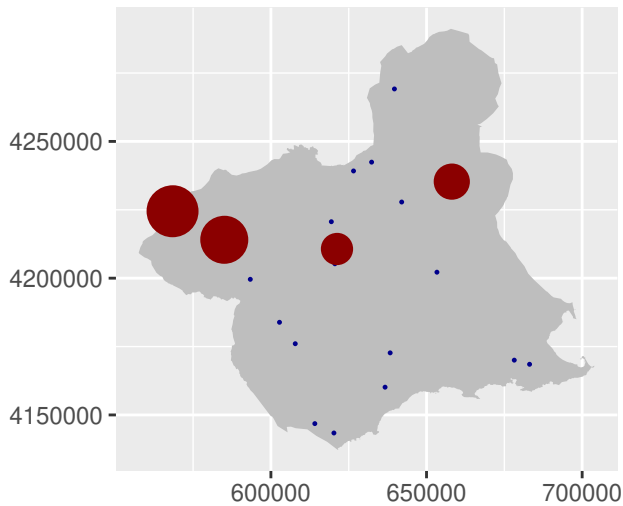

# *Philaenus spumarius*

2020/10/20

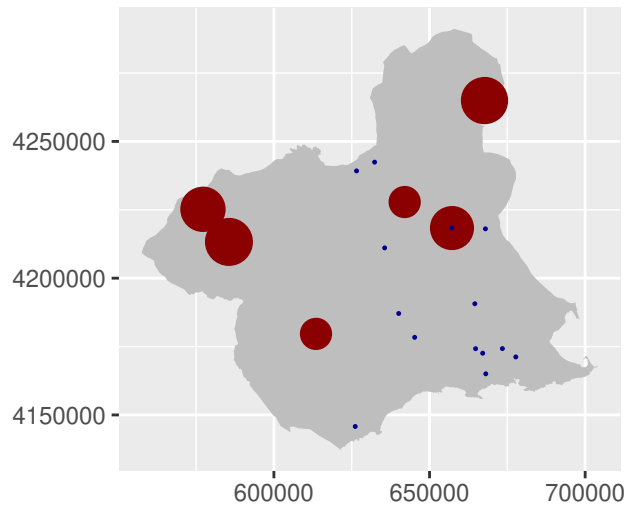

# *Philaenus spumarius*

2020/09/28

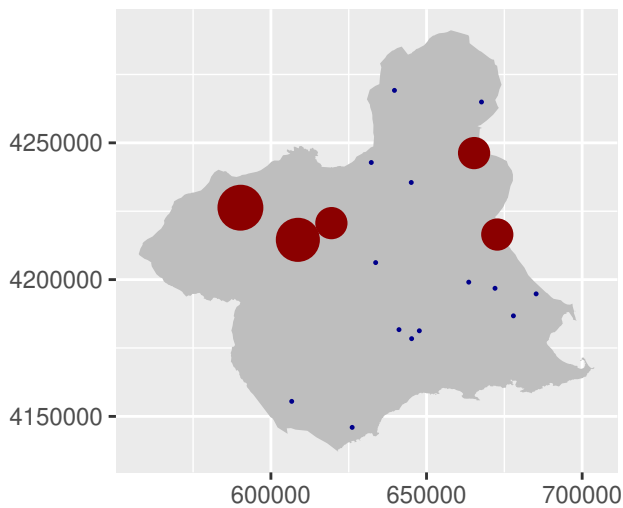

# *Philaenus spumarius*

2020/11/12

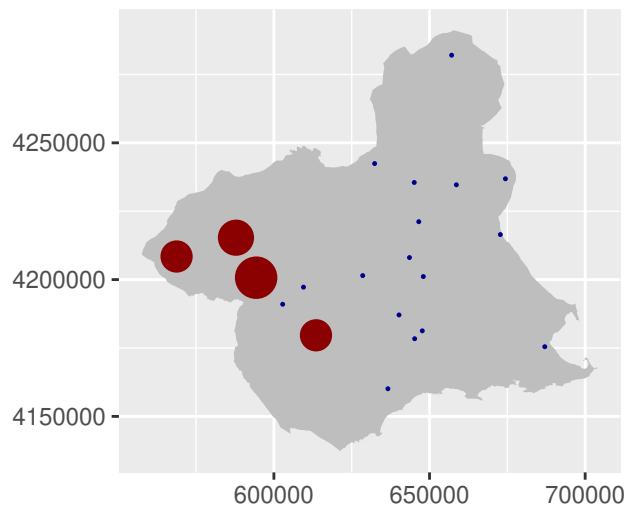

# Neophilaenus campestris

2020/05/22

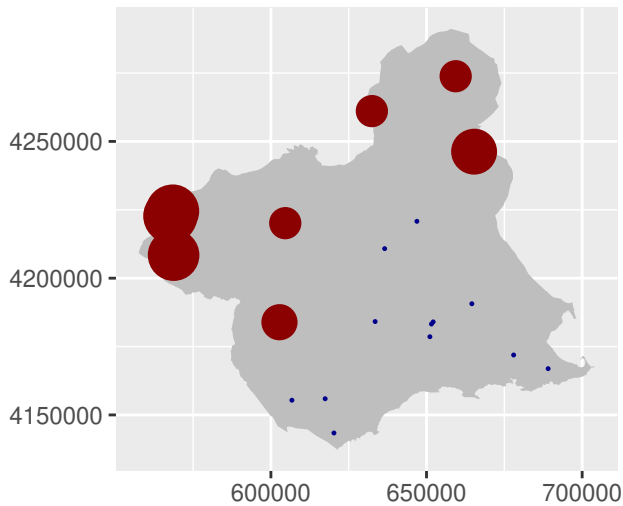

# Neophilaenus campestris

2020/06/18

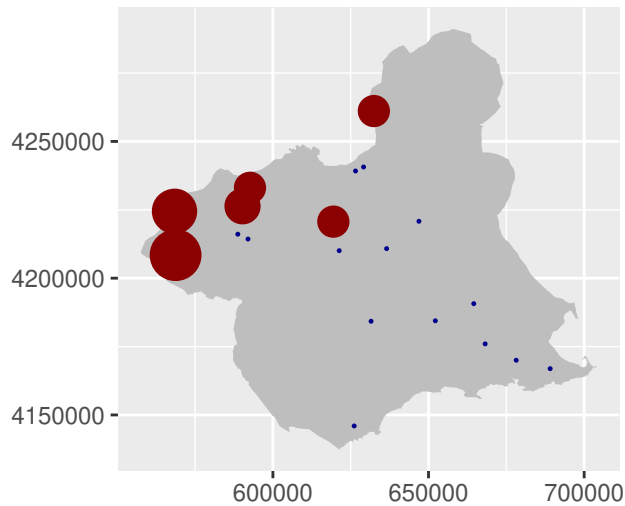

# Neophilaenus campestris

2020/06/05

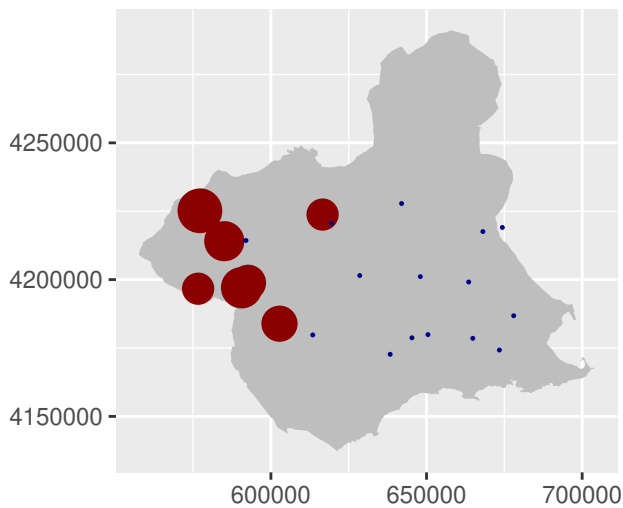

# Neophilaenus campestris

2020/07/03

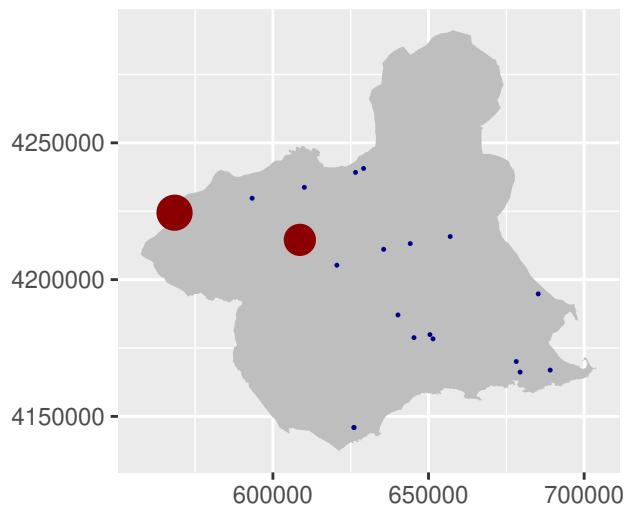

# Neophilaenus campestris

2020/07/17

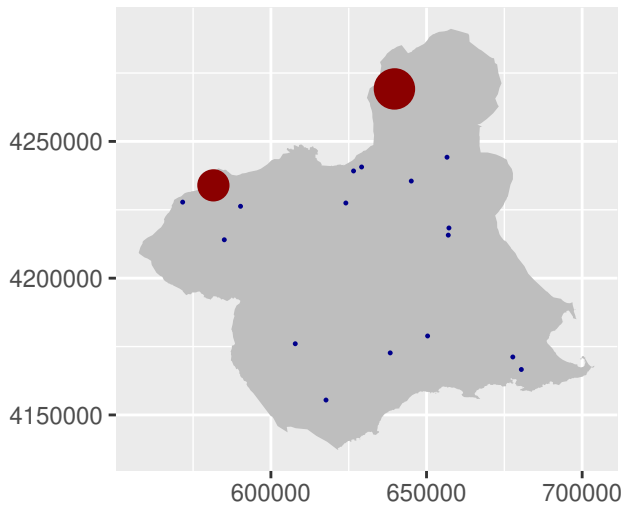

# Neophilaenus campestris

2020/08/13

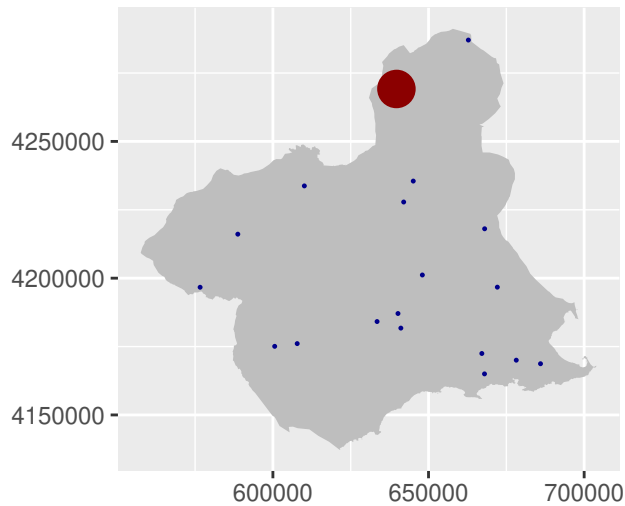

# Neophilaenus campestris

2020/07/31

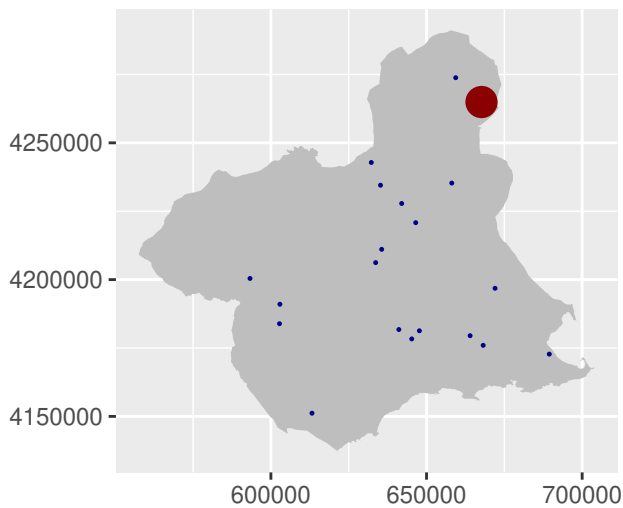

# Neophilaenus campestris

2020/08/31

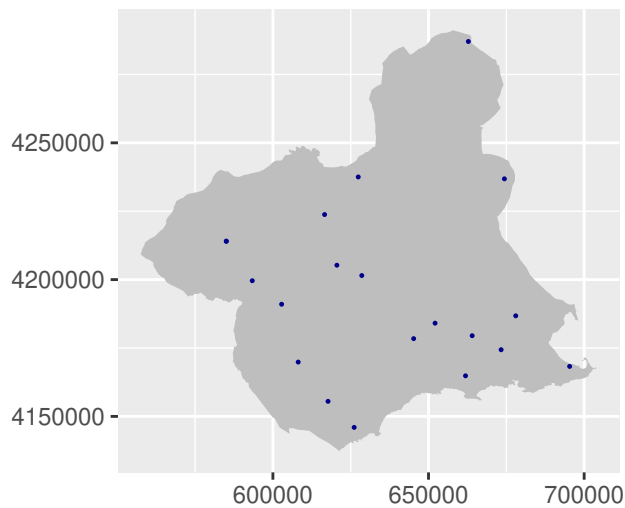

# Neophilaenus campestris

2020/09/15

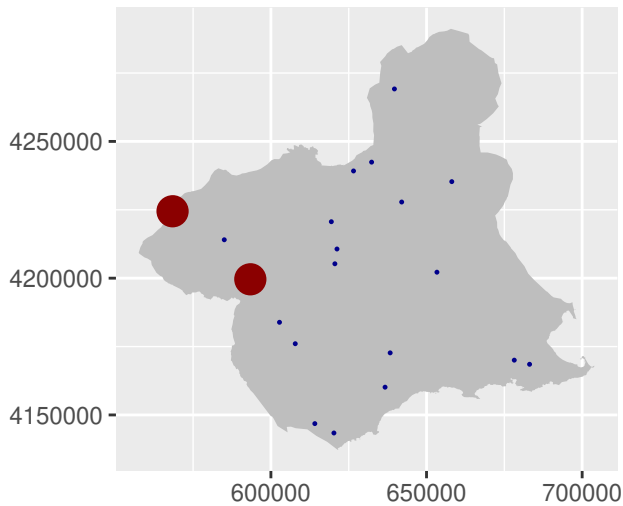

# Neophilaenus campestris

2020/10/20

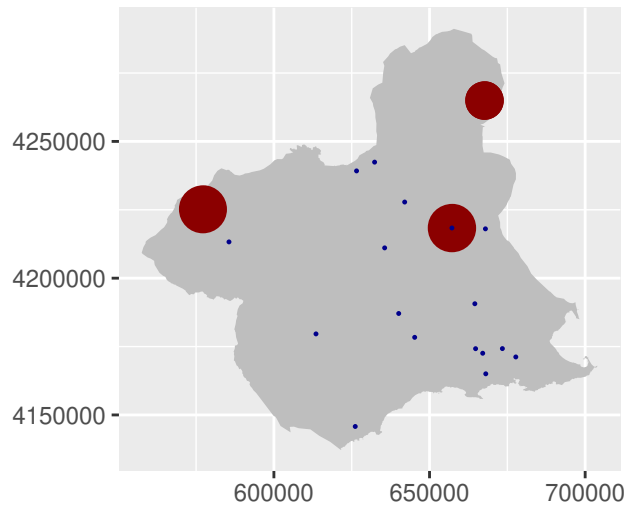

# Neophilaenus campestris

2020/09/28

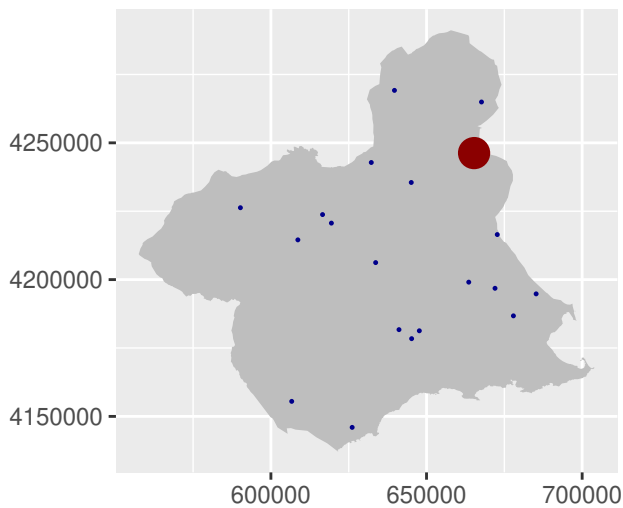

# Neophilaenus campestris

2020/11/12

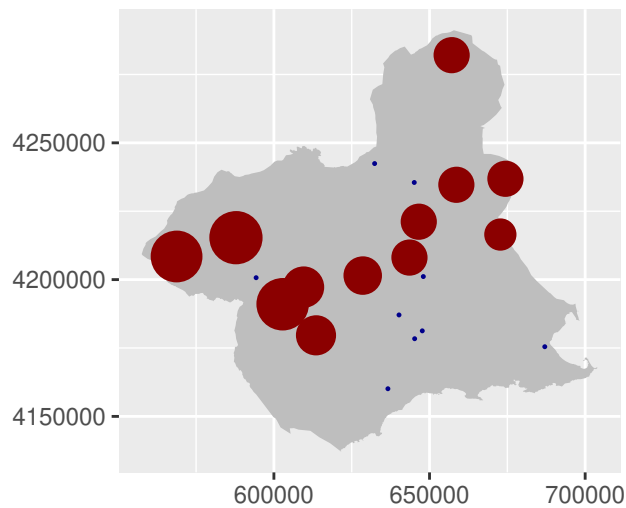

# Neophilaenus lineatus

2020/05/22

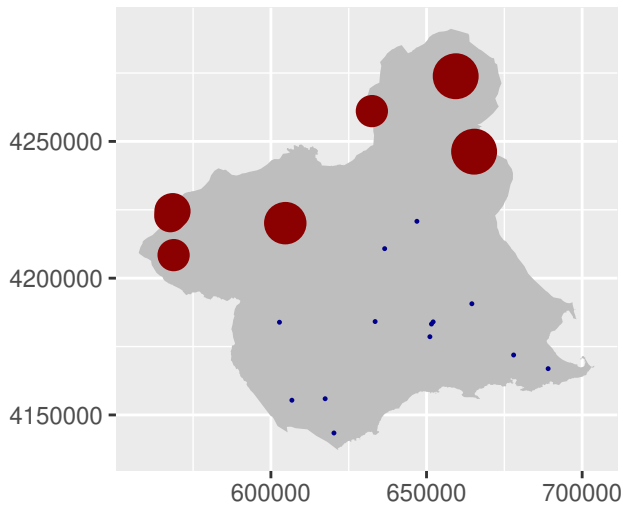

# Neophilaenus lineatus

2020/06/18

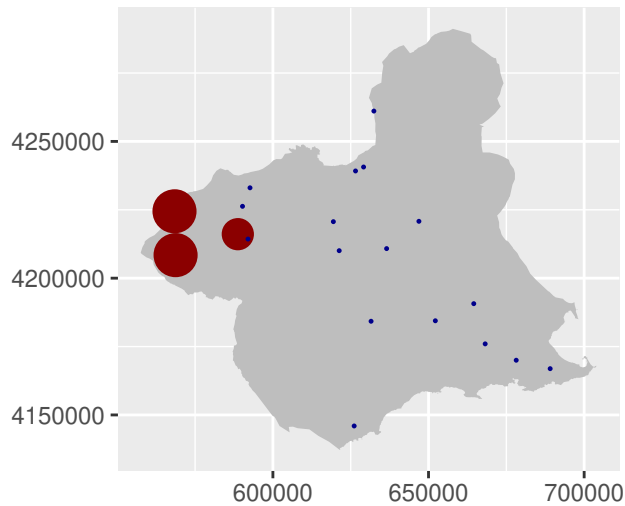

# Neophilaenus lineatus

2020/06/05

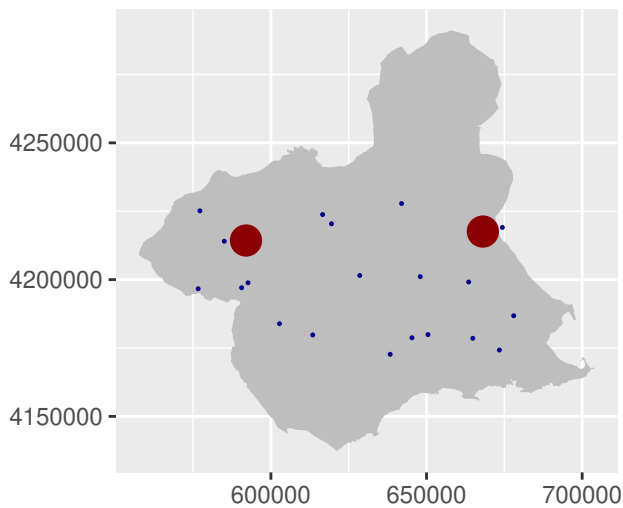

# Neophilaenus lineatus

2020/07/03

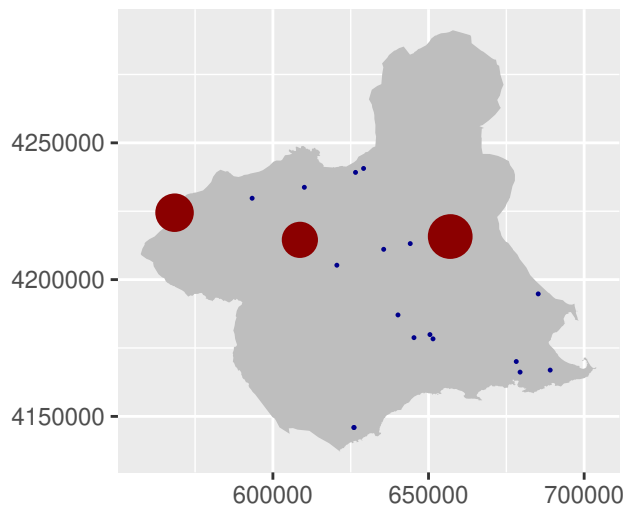

# Neophilaenus lineatus

2020/07/17

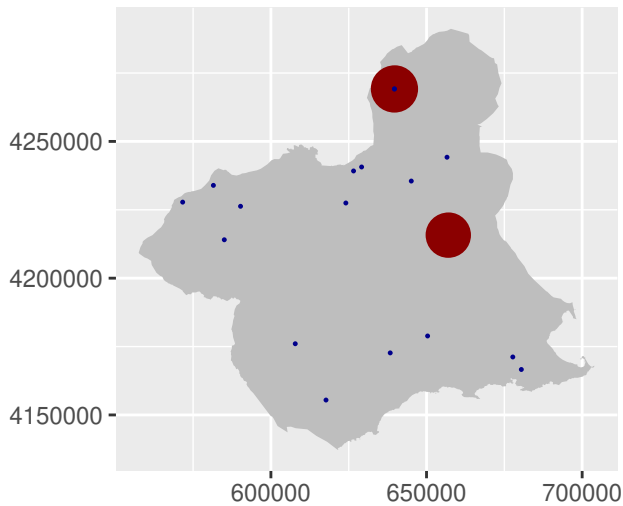

# Neophilaenus lineatus

2020/08/13

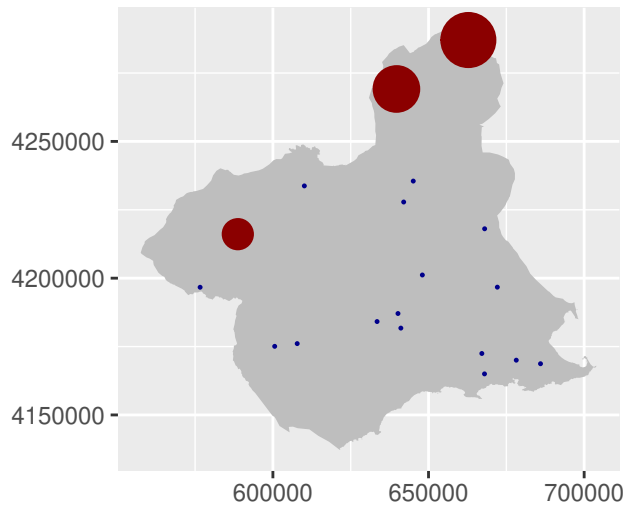

# Neophilaenus lineatus

2020/07/31

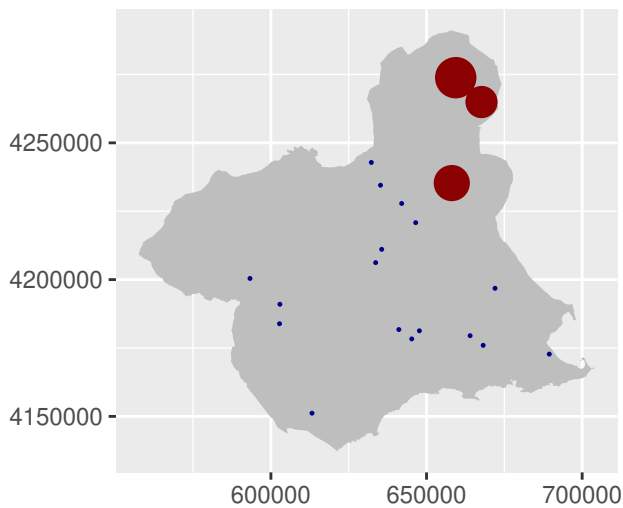

# Neophilaenus lineatus

2020/08/31

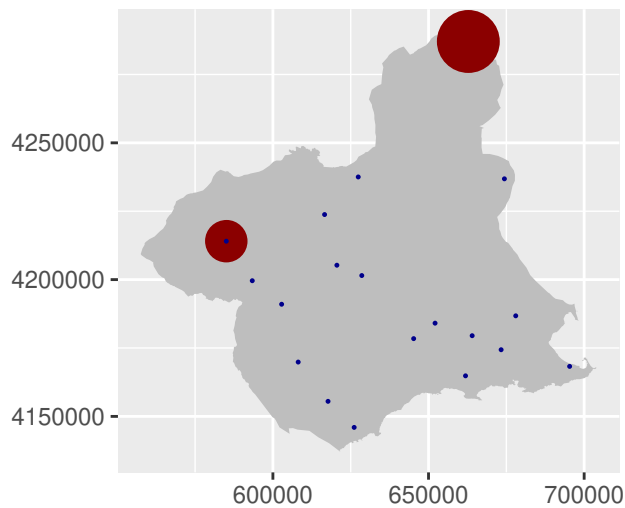



# Neophilaenus lineatus

2020/09/15

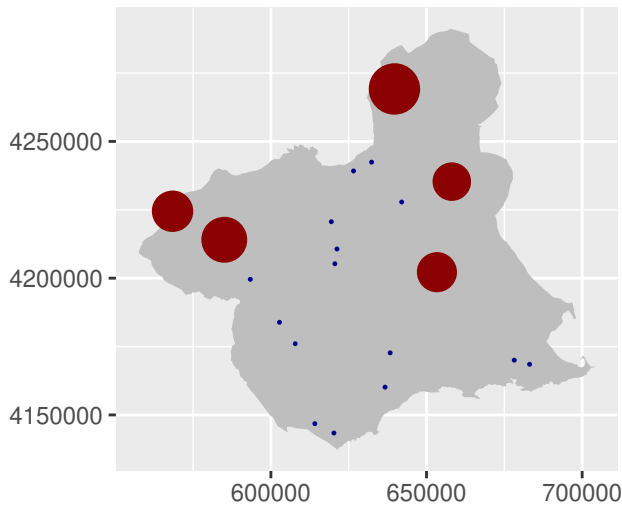

# Neophilaenus lineatus

2020/10/20

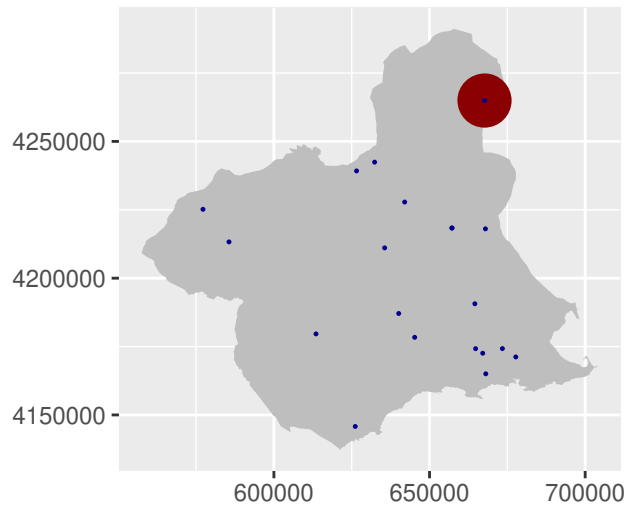

# Neophilaenus lineatus

2020/09/28

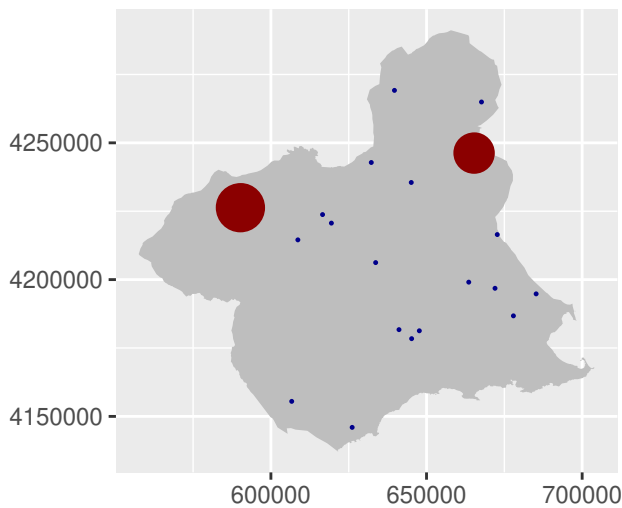

# Neophilaenus lineatus

2020/11/12

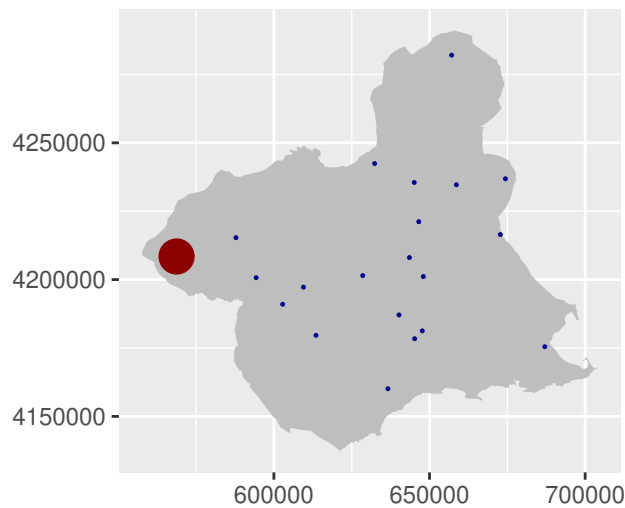

# *Lepyronia coleoptrata*

2020/05/22

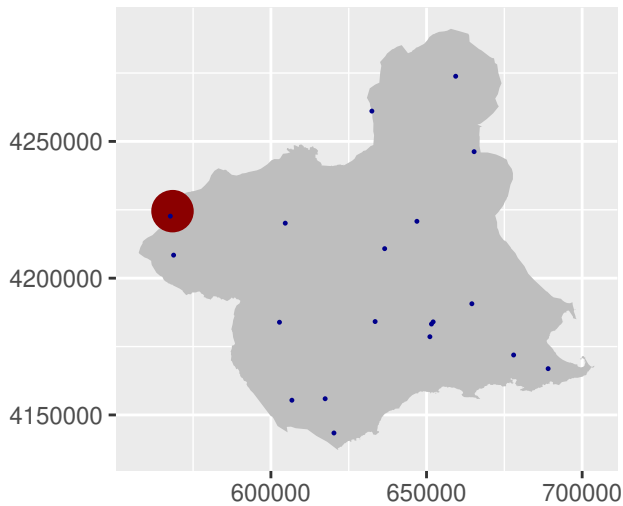

# *Lepyronia coleoptrata*

2020/06/18

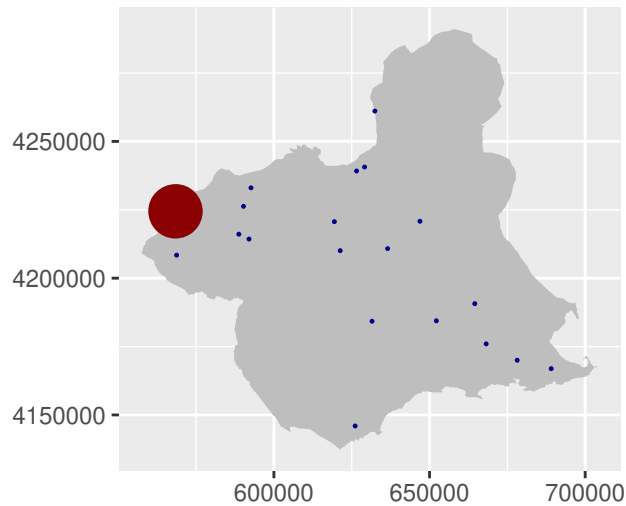

# *Lepyronia coleoptrata*

2020/06/05

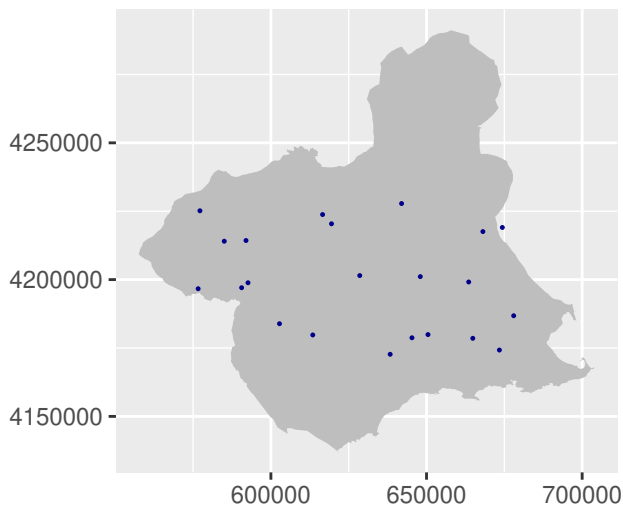

# *Lepyronia coleoptrata*

2020/07/03

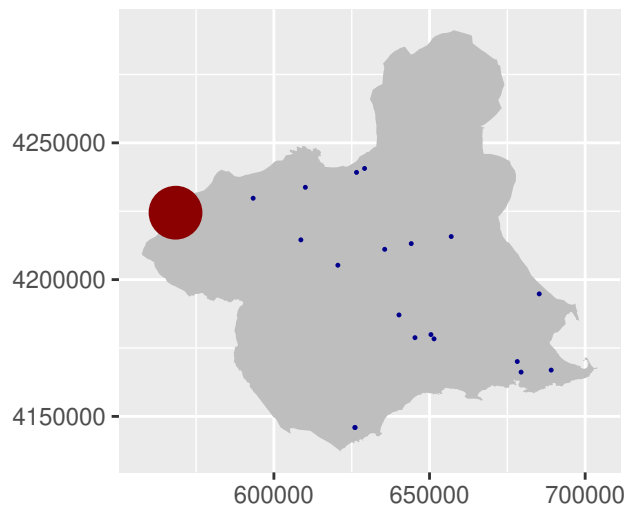

# *Lepyronia coleoptrata*

2020/07/17

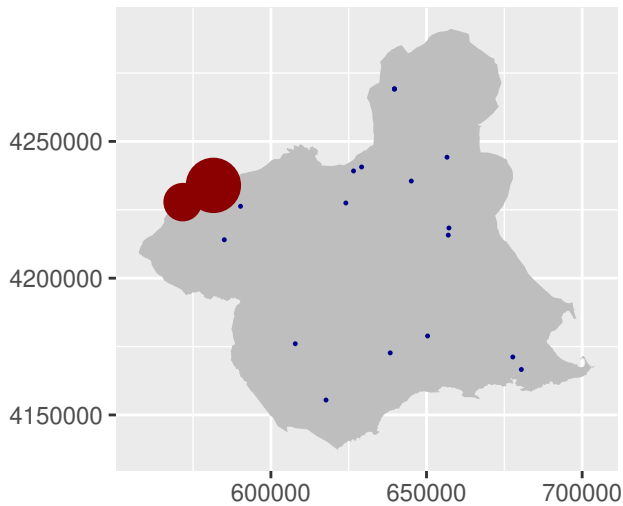

# *Lepyronia coleoptrata*

2020/08/13

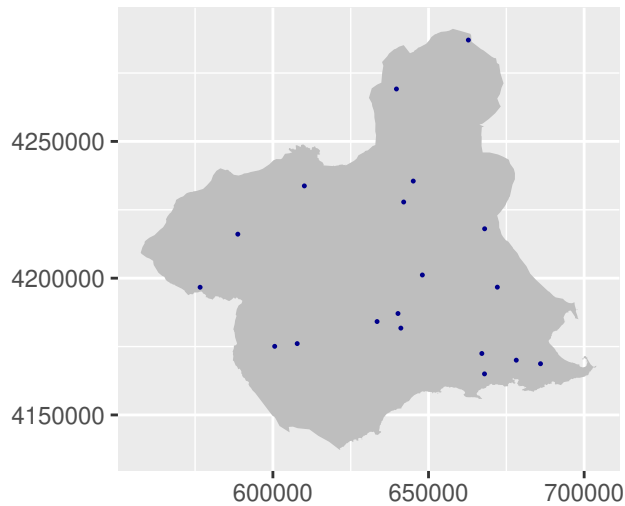

# *Lepyronia coleoptrata*

2020/07/31

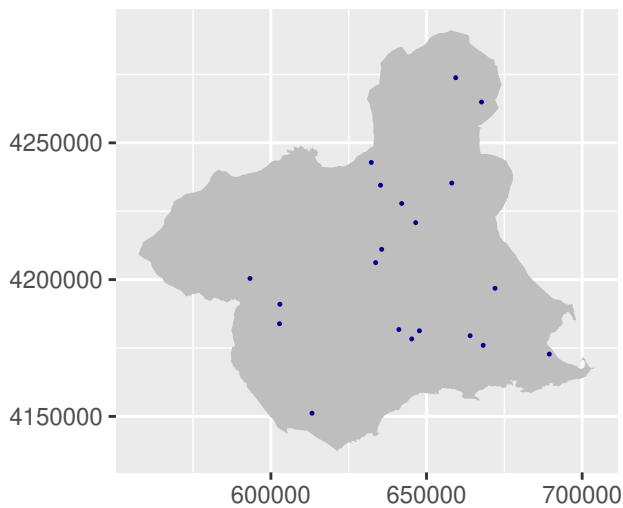

# *Lepyronia coleoptrata*

2020/08/31

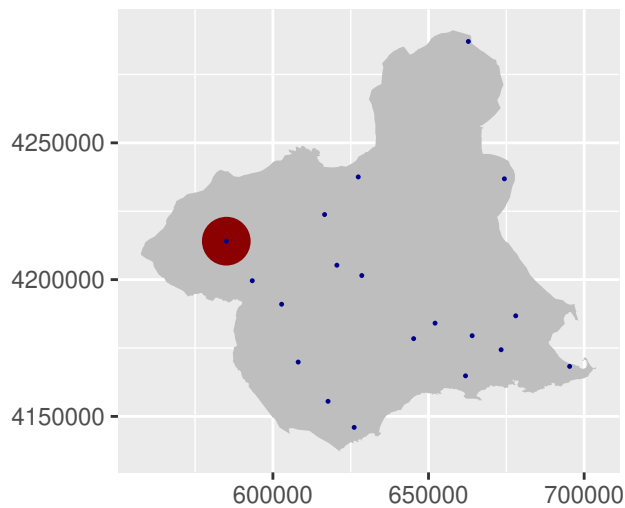

# *Lepyronia coleoptrata*

2020/09/15

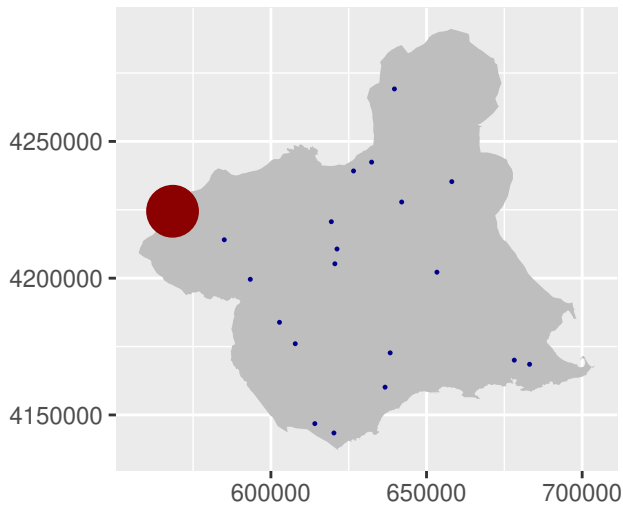

# *Lepyronia coleoptrata*

2020/10/20

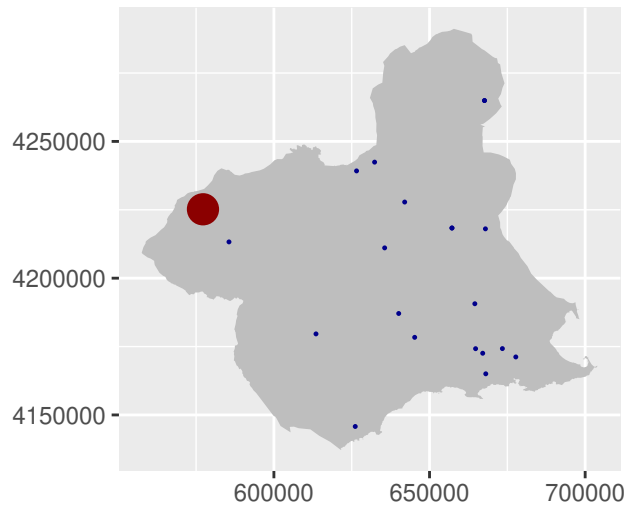

# *Lepyronia coleoptrata*

2020/09/28

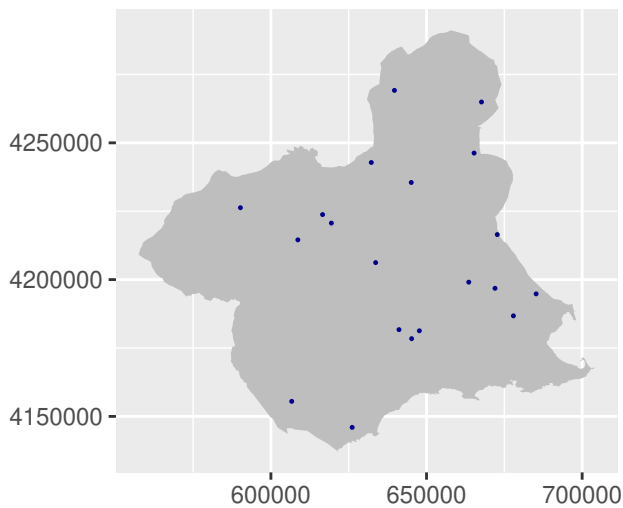

# *Lepyronia coleoptrata*

2020/11/12

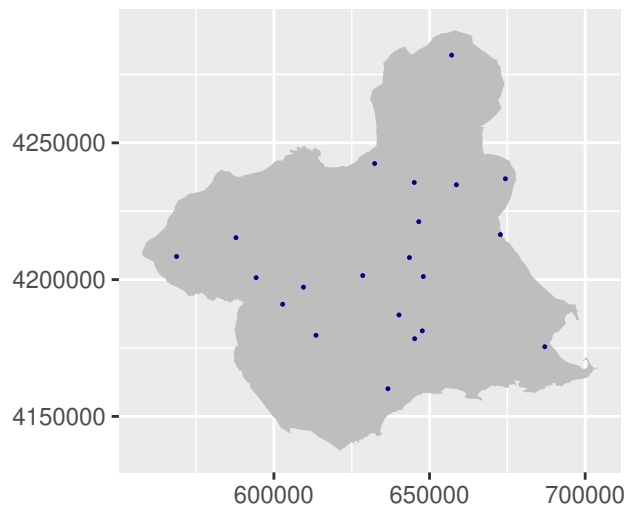

Supplement: s1 [file s1]
